# Supplementary material for: Assessing phytoplankton community composition in the Atlantic Ocean from in situ and satellite observations
Source: Frontiers journal article supplement (doi:10.3389/fmars.2023.1229692), 2023-11-03
Supplement: Data_Sheet_1.xlsx [file Data_Sheet_1.xlsx]

## Sheet: WoRMS_BV_CC_AMT
		WoRMS	Biovolume	Cell Carbon	AMT28	AMT29
Class /Group	Species/Taxon	AphiaID	(µm3)	(pgC cell-1)	presence	presence
Bacillariophyceae	Bacteriastrum delicatum	164108	1774.42	85	x
Bacillariophyceae	Chaetoceros danicus	149120	4105.98	178	x
Bacillariophyceae	Chaetoceros densus	149121	25125.1	878	x
Bacillariophyceae	Chaetoceros didymus	149122	2874.12	130	x
Bacillariophyceae	Chaetoceros messanense	418509	883.846	46	x
Bacillariophyceae	Chaetoceros spp.	148985	7848.57	315	x	x
Bacillariophyceae	Corethron criophilum	149110	53935.4	1721	x
Bacillariophyceae	Coscinodiscus spp.	148917	616795	14727	x	x
Bacillariophyceae	Cylindrotheca closterium	149004	382.624	22	x
Bacillariophyceae	Dactyliosolen fragilissimus	149310	11173.9	430		x
Bacillariophyceae	Dactyliosolen phuketensis	248064	18422.7	668	x	x
Bacillariophyceae	Guinardia cylindrus	163241	2476.07	114	x
Bacillariophyceae	Guinardia flaccida	149132	61537.4	1933		x
Bacillariophyceae	Hemiaulus hauckii	163249	61537.4	1933	x	x
Bacillariophyceae	Hemiaulus sinensis	163250	3177.09	142		x
Bacillariophyceae	Lauderia annulata	149135	12241.6	466	x	x
Bacillariophyceae	Leptocylindricus danicus	149106	1869.5	89	x
Bacillariophyceae	Leptocylindricus minimus	149039	247.727	15	x
Bacillariophyceae	Meuniera membranacea	149145	23346.3	823		x
Bacillariophyceae	Navicula spp.	149142	6340	261	x	x
Bacillariophyceae	Nitzschia acicularis	149046	343.391	20		x
Bacillariophyceae	Proboscia alata	149168	15111.2	561	x	x
Bacillariophyceae	Proboscia cf. eumorpha	156642	17082.6	625	x
Bacillariophyceae	Proboscia indica	345513	109786	3219	x	x
Bacillariophyceae	Rhizosolenia setigera	149115	210376	5709	x	x
Bacillariophyceae	Rhizosolenia styliformis	149629	1.23364e+06	27123	x	x
Bacillariophyceae	Rhizosolenia spp.	149069	643915	15296	x	x
Bacillariophyceae	Thalassiosira spp.	148912	53722	1715	x
Bacillariophyceae	Thalassiotrix longissima	157083	11765.6	450	x	x
Bacillariophyceae	Thalassiotrix spp.	157081	10908.8	421	x	x
Autothrophic Dinophyceae	Achradina pulchra	109716	4739.36	665		x
Autothrophic Dinophyceae	Actiniscus pentasterias	109717	12752.6	1564		x
Autothrophic Dinophyceae	Alexandrium spp.	109470	29310.3	3210	x	x
Autothrophic Dinophyceae	Amphidinium crassum	109726	1741.5	280		x
Autothrophic Dinophyceae	Amphidinium sphenoides	109754	1908.12	303	x	x
Autothrophic Dinophyceae	Amphidinium cf. stigmatum	109756	924.43	162	x	x
Autothrophic Dinophyceae	Amphidinium spp.	109473	1463.96	241	x	x
Autothrophic Dinophyceae	Azadinium caudatum var. caudata	837075	13910.9	1686	x
Autothrophic Dinophyceae	Azadinium caudatum var. margalefii	846290	13910.9	1686		x
Autothrophic Dinophyceae	Azadinium spp.	391508	4484.6	634	x	x
Autothrophic Dinophyceae	Balechina coerulea	232737	151524	13272		x
Autothrophic Dinophyceae	Brachidinium capitatum	110323	12394.7	1526	x	x
Autothrophic Dinophyceae	Centrodinium pulchrum	233747	44925	4642.48	x
Autothrophic Dinophyceae	Ceratium arietinum	109929	40979.2	4288		x
Autothrophic Dinophyceae	Ceratium candelabrum	109935	24042.6	2705	x
Autothrophic Dinophyceae	Ceratium contortum	109941	53158.3	5369	x
Autothrophic Dinophyceae	Ceratium extensum	109947	18094.3	2116	x	x
Autothrophic Dinophyceae	Ceratium falcatum	109949	5070	704.899	x
Autothrophic Dinophyceae	Ceratium furca	109950	62499.4	6175	x	x
Autothrophic Dinophyceae	Ceratium fusus var. fusus	109951	19437	2251	x
Autothrophic Dinophyceae	Ceratium fusus var. seta	422704	19437	2251	x	x
Autothrophic Dinophyceae	Ceratium gibberum	109953	86858	8206	x	x
Autothrophic Dinophyceae	Ceratium limulus	109962	528561	39062	x
Autothrophic Dinophyceae	Ceratium lineatum	109963	17403.3	2046	x	x
Autothrophic Dinophyceae	Ceratium macroceros	109967	56241.3	5637	x
Autothrophic Dinophyceae	Ceratium pentagonum	109972	44058.4	4565	x	x
Autothrophic Dinophyceae	Ceratium pentagonum var. longisetum	847488	707464	50251		x
Autothrophic Dinophyceae	Ceratium pentagonum var. tenerum	254451	81090.1	7733	x	x
Autothrophic Dinophyceae	Ceratium pulchellum	109974	300087	23952	x
Autothrophic Dinophyceae	Ceratium ranipes	109975	117909	10686		x
Autothrophic Dinophyceae	Ceratium setaceum	109977	44058.4	4565	x
Autothrophic Dinophyceae	Ceratium teres	109980	7846.36	1028	x	x
Autothrophic Dinophyceae	Ceratium tripos	109982	86858	8206	x	x
Autothrophic Dinophyceae	Ceratium tripos var. atlanticum	345375	7240.09	959	x	x
Autothrophic Dinophyceae	Ceratium tripos var. breve	233831	7240.09	959	x
Autothrophic Dinophyceae	Ceratium vultur	109983	67883.5	6632		x
Autothrophic Dinophyceae	Cladopyxis brachiolata	109989	1763.11	283	x	x
Autothrophic Dinophyceae	Goniodoma polyedricum	233386	15663.2	1868	x	x
Autothrophic Dinophyceae	Gonyaulax digitalis	418136	28056.4	3091		x
Autothrophic Dinophyceae	Gonyaulax milneri	110027	16961	2001		x
Autothrophic Dinophyceae	Gonyaulax spinifera	110041	17906.4	2097	x
Autothrophic Dinophyceae	Gonyaulax turbynei	110043	22638.9	2568		x
Autothrophic Dinophyceae	Gonyaulax verior	110045	20118.2	2319		x
Autothrophic Dinophyceae	Gonyaulax spp.	109519	28403.3	3124	x	x
Autothrophic Dinophyceae	Gymnodinum spp.	109475	12630	1551	x	x
Autothrophic Dinophyceae	Gyrodinium falcatum	232931	4517.36	638		x
Autothrophic Dinophyceae	Gyrodinium fusiforme	109856	23693.1	2671	x	x
Autothrophic Dinophyceae	Gyrodinium spp.	109476	15237	1824	x	x
Autothrophic Dinophyceae	Heterocapsa triquetra	110153	1577.03	257	x
Autothrophic Dinophyceae	Heterocapsa spp.	109540	1310.43	219	x
Autothrophic Dinophyceae	Heterodinium spp.	109522	148986	13079.7		x
Autothrophic Dinophyceae	Histioneis crateriformis	232336	18848.6	2192	x
Autothrophic Dinophyceae	Histioneis hyalina	232362	7406.37	978		x
Autothrophic Dinophyceae	Histioneis inclinata	109674	1091.47	187	x	x
Autothrophic Dinophyceae	Karenia bicuneiformis	233014	15828.3	1885	x	x
Autothrophic Dinophyceae	Karenia brevis	233015	6770.36	905	x	x
Autothrophic Dinophyceae	Karenia mikimotoi	233024	5954.8	810	x	x
Autothrophic Dinophyceae	Karenia papilionacea	246593	16130	1916	x
Autothrophic Dinophyceae	Karlodinium veneficum	233037	516.684	98	x
Autothrophic Dinophyceae	Katodinium glaucum	109885	3668.59	533	x	x
Autothrophic Dinophyceae	Lessardia elongata	232703	950.899	166	x	x
Autothrophic Dinophyceae	Lingulodinium polyedra	233592	28161.4	3101	x	x
Autothrophic Dinophyceae	Mesoporus perforatus	232516	1310.43	219	x	x
Autothrophic Dinophyceae	Microcanthodinium claytonii	109992	25664.9	2862	x	x
Autothrophic Dinophyceae	Microcanthodinium setigerum	109993	25664.9	2862	x
Autothrophic Dinophyceae	Ornithocercus heteroporus	109692	722.953	131	x
Autothrophic Dinophyceae	Ornithocercus magnificus	109693	15043.8	1804		x
Autothrophic Dinophyceae	Oxytoxum caudatum	110082	1577.03	257	x
Autothrophic Dinophyceae	Oxytoxum coronatum	110086	2284.55	354	x	x
Autothrophic Dinophyceae	Oxytoxum crassum	110087	1806.45	289	x
Autothrophic Dinophyceae	Oxytoxum curvatum	110090	19017.9	2209	x
Autothrophic Dinophyceae	Oxytoxum elongatum	233859	5204.28	721		x
Autothrophic Dinophyceae	Oxytoxum globosum	110096	1098.23	188	x	x
Autothrophic Dinophyceae	Oxytoxum gracile	233870	703.826	128	x
Autothrophic Dinophyceae	Oxytoxum laticeps	110097	1166.12	198	x	x
Autothrophic Dinophyceae	Oxytoxum mediterraneum	110102	787.203	141		x
Autothrophic Dinophyceae	Oxytoxum ovale	110108	1044.32	180		x
Autothrophic Dinophyceae	Oxytoxum sceptrum	110114	858.71	152	x	x
Autothrophic Dinophyceae	Oxytoxum scolopax	110115	832.61	148	x	x
Autothrophic Dinophyceae	Oxytoxum sphaeroideum	110116	646.872	119	x	x
Autothrophic Dinophyceae	Oxytoxum turbo	233871	1338.17	223	x
Autothrophic Dinophyceae	Oxytoxum variabile	233868	390.844	77	x	x
Autothrophic Dinophyceae	Oxytoxum spp.	109528	984.127	171	x	x
Autothrophic Dinophyceae	Palaeophalacroma unicinctum	233359	7406.37	978	x	x
Autothrophic Dinophyceae	Phalacroma doryphorum	232466	162091	14068	x	x
Autothrophic Dinophyceae	Phalacroma rotundatum	156505	29638.1	3241	x	x
Autothrophic Dinophyceae	Prorocentrum cf. compressum	110295	7022.09	934	x	x
Autothrophic Dinophyceae	Prorocentrum cordatum	232376	852.175	151	x	x
Autothrophic Dinophyceae	Prorocentrum dactylus	110297	62722.1	6194	x	x
Autothrophic Dinophyceae	Prorocentrum dentatum	110298	1456.93	240	x	x
Autothrophic Dinophyceae	Prorocentrum gracile	110300	4525.56	639	x
Autothrophic Dinophyceae	Prorocentrum magnum	232403	1241.42	209		x
Autothrophic Dinophyceae	Prorocentrum micans	110303	10654.3	1339	x	x
Autothrophic Dinophyceae	Prorocentrum rostratum	110311	8049.89	1051	x	x
Autothrophic Dinophyceae	Prorocentrum triestinum	110316	3533.5	516	x
Autothrophic Dinophyceae	Prorocentrum vaginula	232300	8049.89	1051	x	x
Autothrophic Dinophyceae	Prorocentrum spp.	109566	17363.9	2042	x	x
Autothrophic Dinophyceae	Protoceratium reticulatum	110321	13168.7	1608	x	x
Autothrophic Dinophyceae	Protoceratium spinulosum	110322	10773	1351.88		x
Autothrophic Dinophyceae	Pyrocystis lunula	164053	21469.7	2453	x	x
Autothrophic Dinophyceae	Pyrophacus steinii	110267	80204.7	7660	x	x
Autothrophic Dinophyceae	Torodinium robustum	109889	4386.5	622	x	x
Autothrophic Dinophyceae	Torodinium teredo	109890	4863.31	680	x	x
Heterothrophic Dinophyceae	Blepharocysta splendor-maris	110179	32203.5	3482		x
Heterothrophic Dinophyceae	Blepharocysta spp.	109548	26737	2965		x
Heterothrophic Dinophyceae	Cochlodinium pulchellum	109772	8076.5	1054		x
Heterothrophic Dinophyceae	Cochlodinium spp.	109474	2412	371	x	x
Heterothrophic Dinophyceae	Corythodinium frenguelli	110074	5227	723.719	x
Heterothrophic Dinophyceae	Corythodinium tesselatum	110077	7581.95	998	x	x
Heterothrophic Dinophyceae	Dinophysis acuminata	109603	24258.7	2726	x	x
Heterothrophic Dinophyceae	Dinophysis argus	109609	174368	14984		x
Heterothrophic Dinophyceae	Dinophysis capitulata	232170	15838	1886		x
Heterothrophic Dinophyceae	Dinophysis exigua	232185	2292.02	355		x
Heterothrophic Dinophyceae	Dinophysis fortii	109624	21905.9	2496	x
Heterothrophic Dinophyceae	Dinophysis cf. infundibulum	109629	21054.9	2412		x
Heterothrophic Dinophyceae	Dinophysis ovum	646201	6545.75	879		x
Heterothrophic Dinophyceae	Dinophysis parvula	109644	48466.2	4957		x
Heterothrophic Dinophyceae	Dinophysis punctata	109651	6305.03	851		x
Heterothrophic Dinophyceae	Dinophysis tripos	109662	40879.7	4279	x
Heterothrophic Dinophyceae	Dinophysis spp.	109462	41987.4	4379	x
Heterothrophic Dinophyceae	Erythropsidinium agile	109905	43578.4	4522	x	x
Heterothrophic Dinophyceae	Kofoidinium velleloides	109920	1098.23	188		x
Heterothrophic Dinophyceae	Nematodinium torpedo	233113	25664.9	2862		x
Heterothrophic Dinophyceae	Podolampas antarctica	232636	8143	1061.49		x
Heterothrophic Dinophyceae	Podolampas bipes	110199	3908.62	563		x
Heterothrophic Dinophyceae	Podolampas elegans	110201	1763.11	283	x
Heterothrophic Dinophyceae	Podolampas palmipes	232625	1763.11	283		x
Heterothrophic Dinophyceae	Podolampas spinifera	110202	1470.99	242	x	x
Heterothrophic Dinophyceae	Preperidinium meuniera	614618	36131.1	3846	x
Heterothrophic Dinophyceae	Pronoctiluca pelagica	109903	997.461	173	x	x
Heterothrophic Dinophyceae	Pronoctiluca rostrata	233188	2274	352.588	x
Heterothrophic Dinophyceae	Pronoctiluca spinifera	109904	1894	301.062		x
Heterothrophic Dinophyceae	Protoperidinium bipes	110208	1562.83	255	x
Heterothrophic Dinophyceae	Protoperidinium brevipes	110210	16765	1981	x	x
Heterothrophic Dinophyceae	Protoperidinium cerasus	162749	21885.6	2494	x
Heterothrophic Dinophyceae	Protoperidinium claudicans	163862	113450	10336	x
Heterothrophic Dinophyceae	Protoperidinium cf. corniculum	233411	4400	623.653	x
Heterothrophic Dinophyceae	Protoperidinium crassipes	110214	99309.8	9213		x
Heterothrophic Dinophyceae	Protoperidinium curtipes	110215	159494	13873	x
Heterothrophic Dinophyceae	Protoperidinium divergens	110219	123147	11095		x
Heterothrophic Dinophyceae	Protoperidinium globulus	232291	128404	11503	x	x
Heterothrophic Dinophyceae	Protoperidinium hirobis	233269	6787.68	907		x
Heterothrophic Dinophyceae	Protoperidinium minutum	110233	25571.5	2853	x
Heterothrophic Dinophyceae	Protoperidinium oblongum	110238	152582	13352		x
Heterothrophic Dinophyceae	Protoperidinium ovatum	110241	120761	10909	x	x
Heterothrophic Dinophyceae	Protoperidinium oviforme	110242	36784.3	3906	x	x
Heterothrophic Dinophyceae	Protoperidinium ovum	110243	6545.75	879	x	x
Heterothrophic Dinophyceae	Protoperidinium pallidum	110244	110154	10076	x	x
Heterothrophic Dinophyceae	Protoperidinium pyriforme	110249	29627.5	3240	x	x
Heterothrophic Dinophyceae	Protoperidinium steinii	110257	12922.6	1582	x
Heterothrophic Dinophyceae	Protoperidinium subinerme	110259	38007.8	4018	x
Heterothrophic Dinophyceae	Protoperidinium subpyriforme	232894	29627.5	3240		x
Heterothrophic Dinophyceae	Protoperidinium spp.	109553	68511.8	6685	x	x
Heterothrophic Dinophyceae	Ptychodiscus noctiluca	109888	29574.6	3235	x	x
Heterothrophic Dinophyceae	Spiraulax kofoidii	110048	340771	26733		x
Heterothrophic Dinophyceae	Warnowia spp.	109491	12141.2	1499		x
Filamentous Cyanobacteria	Oscillatoria limosa	146554	137.351	22		x
Filamentous Cyanobacteria	Oscillatoria spp.	146549	137.351	22	x
Filamentous Cyanobacteria	Trichodesmium erythraeum	660919	104.372	17	x	x
Prasinophyceae	Pterosperma cristatum	376081	2012.01	241	x	x
Prasinophyceae	Pterosperma cuboides	376690	14870.3	1418	x
Prasinophyceae	Pterosperma marginatum	376082	2469.8	289	x	x
Prasinophyceae	Pterosperma moebii	343882	2335.19	275	x	x
Prasinophyceae	Pterosperma nationalis	376083	2012.01	241		x
Prasinophyceae	Pterosperma polygonum	341610	4020.16	445	x	x
Prasinophyceae	Pterosperma undulatum	376084	1964.96	236		x
Prasinophyceae	Pterosperma spp.	160595	2556.78	298	x	x
Prasinophyceae	Pyramimonas spp.	134529	661.935	90	x
Haptophyceae	Phaeocystis spp.	115088	164	21	x	x
